# Supplementary material for: Serological profiling reveals hsa-miR-451a as a possible biomarker of anaphylaxis
Source: PubMed Central journal article supplement (PMC9057591; doi:10.1172/jci.insight.156669), 2022-04-08
Supplement: jciinsight-7-156669-s282.pdf [file jciinsight-7-156669-s282.pdf]

1 **Supplementary Figures for online repository**

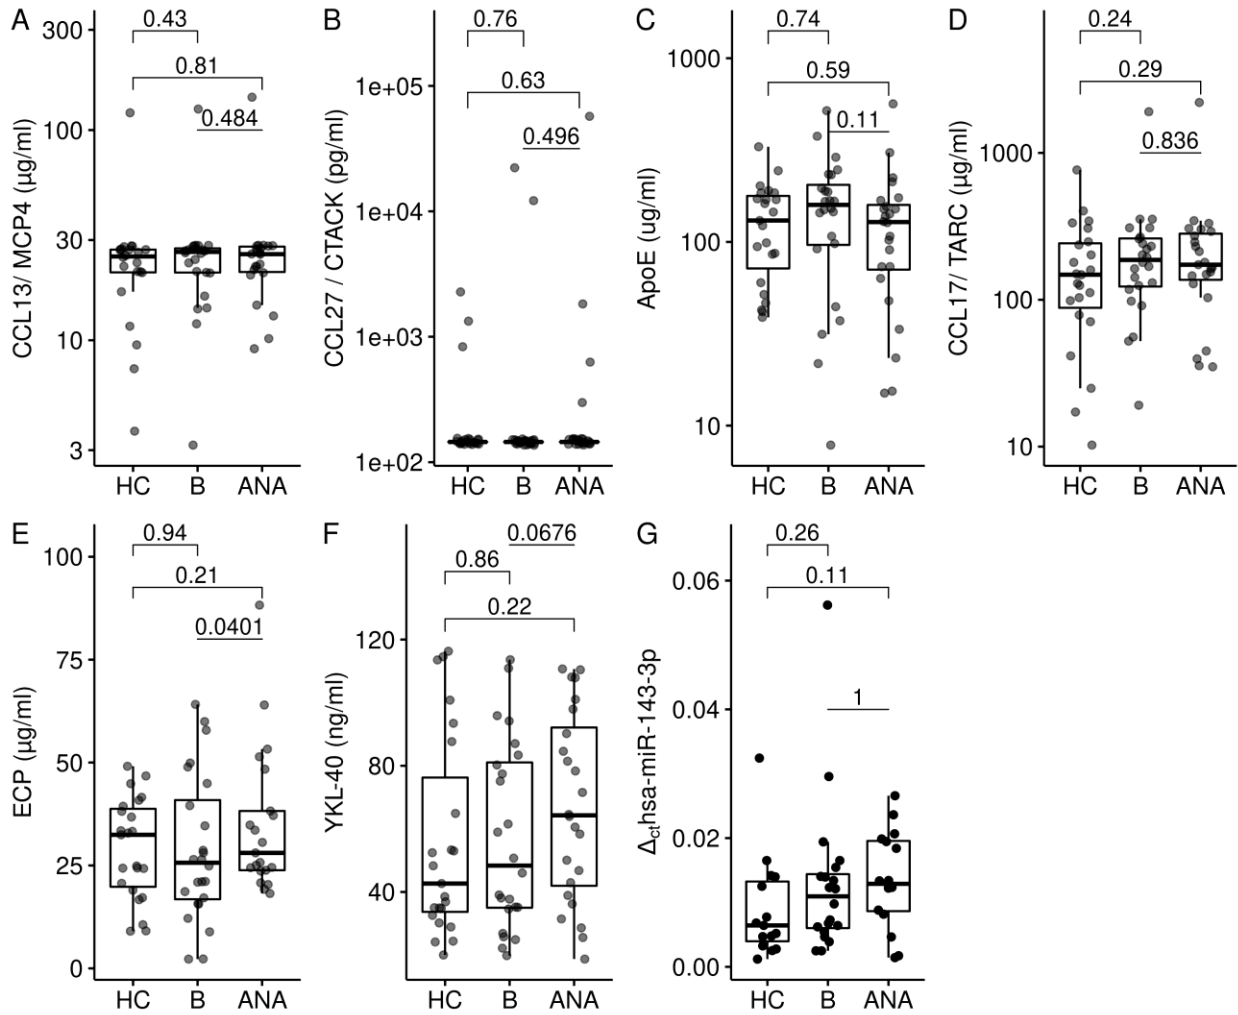

2

3 **Figure S1: Candidate biomarkers without specificity to detect anaphylaxis.** A – F) Protein  
4 candidates measured by ELISA, differences between healthy (HC, n = 24), and anaphylaxis  
5 patients outside (B, n = 24) and during anaphylaxis (ANA, n = 24). G) miRNA delta Ct values  
6 (compared to spike in) measured by RT-qPCR in three groups. HC vs. B and HC vs. ANA - two-  
7 tailed Student's T test; B vs. ANA - two-tailed Student's T test for paired data.



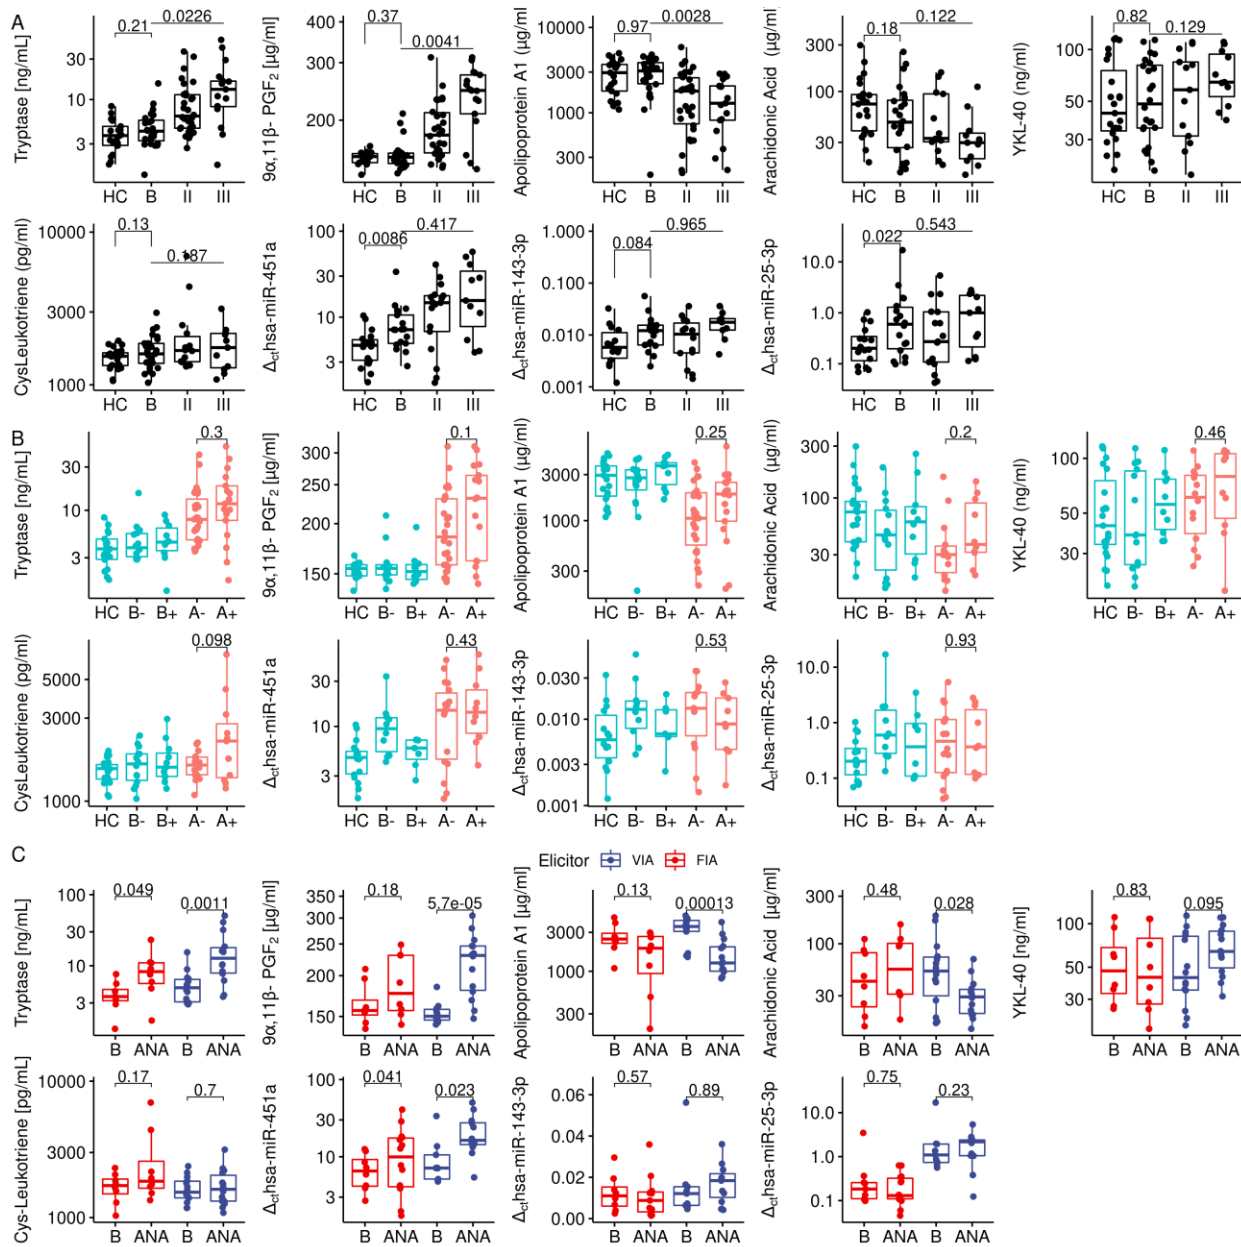

9

10 **Figure S2: Serum levels of biomarkers depend on the severity of anaphylaxis, elicitor. A)**

11 **Severity of anaphylaxis (Ring & Messmer grade II, n = 30; and III, n = 17) and the biomarker**

12 **levels HC - healthy controls (n = 24), B - anaphylaxis patients during baseline (n = 24).**

13 **Comparisons between HC vs B - two-tailed Student't test; comparisons between B vs III - two-**

14 *tailed Student's T test for paired data. B) Stratification of patients based on adrenaline*  
15 *administration during anaphylaxis (A+ n = 17, A- n = 27, red), and compared to healthy controls*  
16 *(HC, n = 24, blue) and baseline samples (B+ n = 10, B- n = 14, blue). Two-tailed Student's T test; +*  
17 *Received adrenaline, - did not receive adrenaline in the ER. C) Biomarkers of anaphylaxis during*  
18 *baseline and acute reaction depending on the elicitor. VIA - venom induced anaphylaxis (n = 14),*  
19 *FIA - food induced anaphylaxis (n = 8), two-tailed Student's T test for paired data.*

20

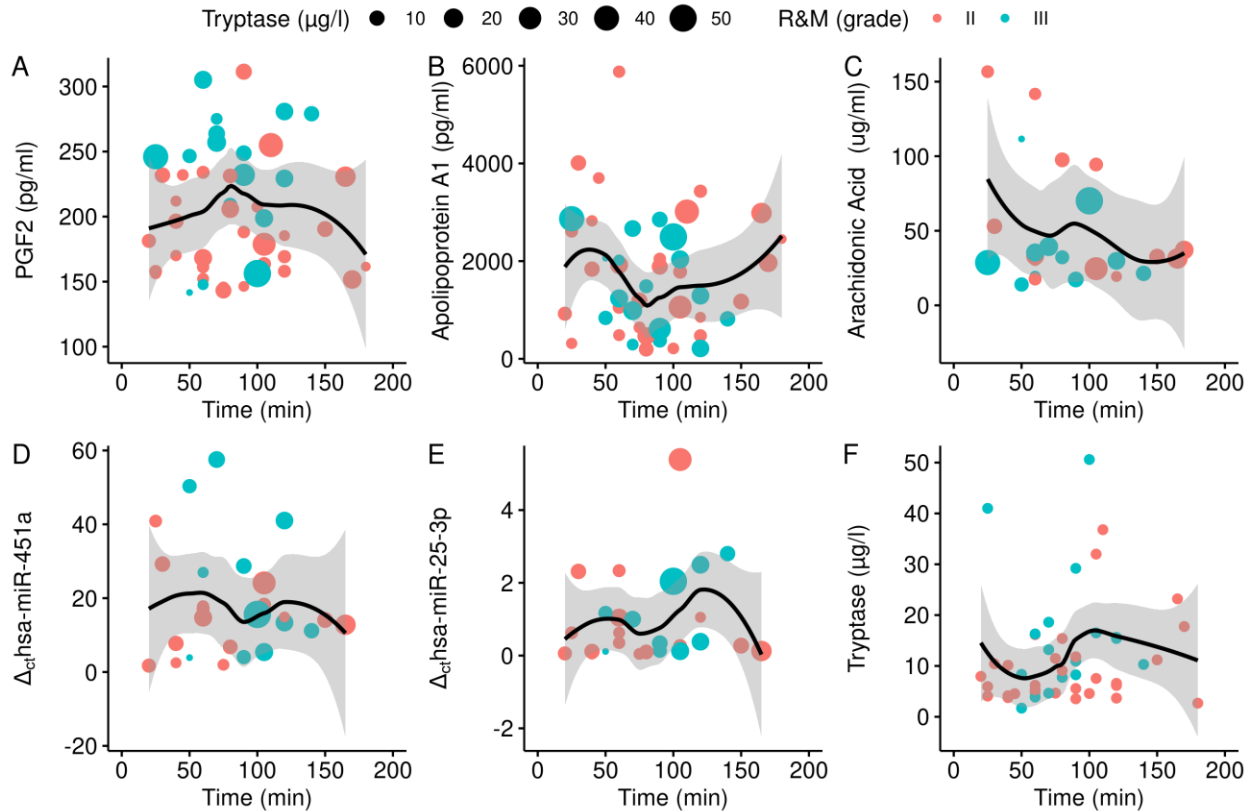

21

22 **Figure S3: Level of biomarkers of anaphylaxis change in time from first reaction symptoms to**  
 23 **blood draw.** A – F) Time between anaphylaxis onset to blood draw and its influence on the  
 24 biomarkers' level. The size of the data points in the graph represents the measured serum  
 25 tryptase and the color illustrates severity grade of a given episode on Ring and Messmer scale.  
 26 The black line illustrates a locally estimated scatterplot smoothing (LOESS) curve (63). Grey  
 27 shading represents 95% confidence intervals.

28

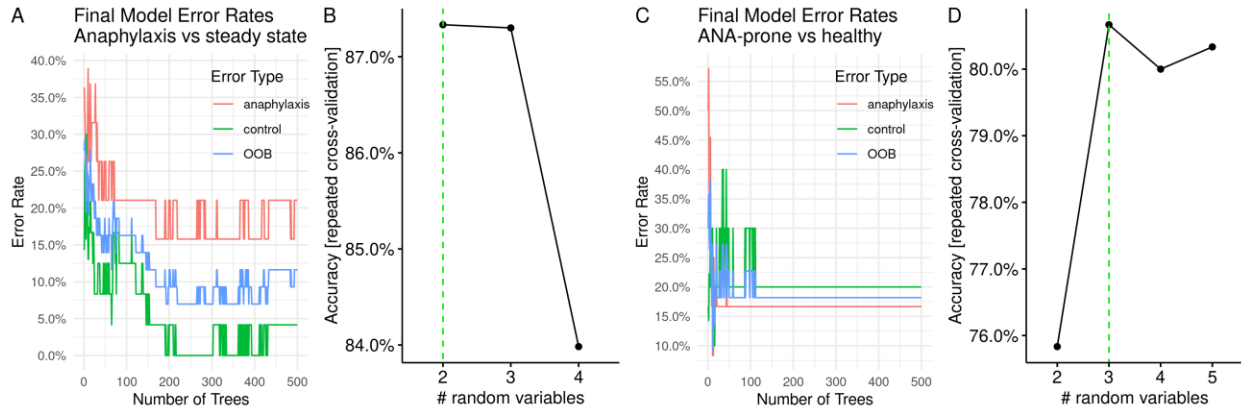

29

30 **Figure S4: Hyperparameter selection for the random forest classifiers. A – B) Anaphylaxis**  
 31 **vs. baseline. C – D) Healthy vs. ana-prone patients (i.e. during baseline). Model error rates**  
 32 **plotted against the number of trees grown during training. OOB - out of bag error. Model**  
 33 **accuracy in regard to the number of randomly selected predictors upon each decision tree.**

34

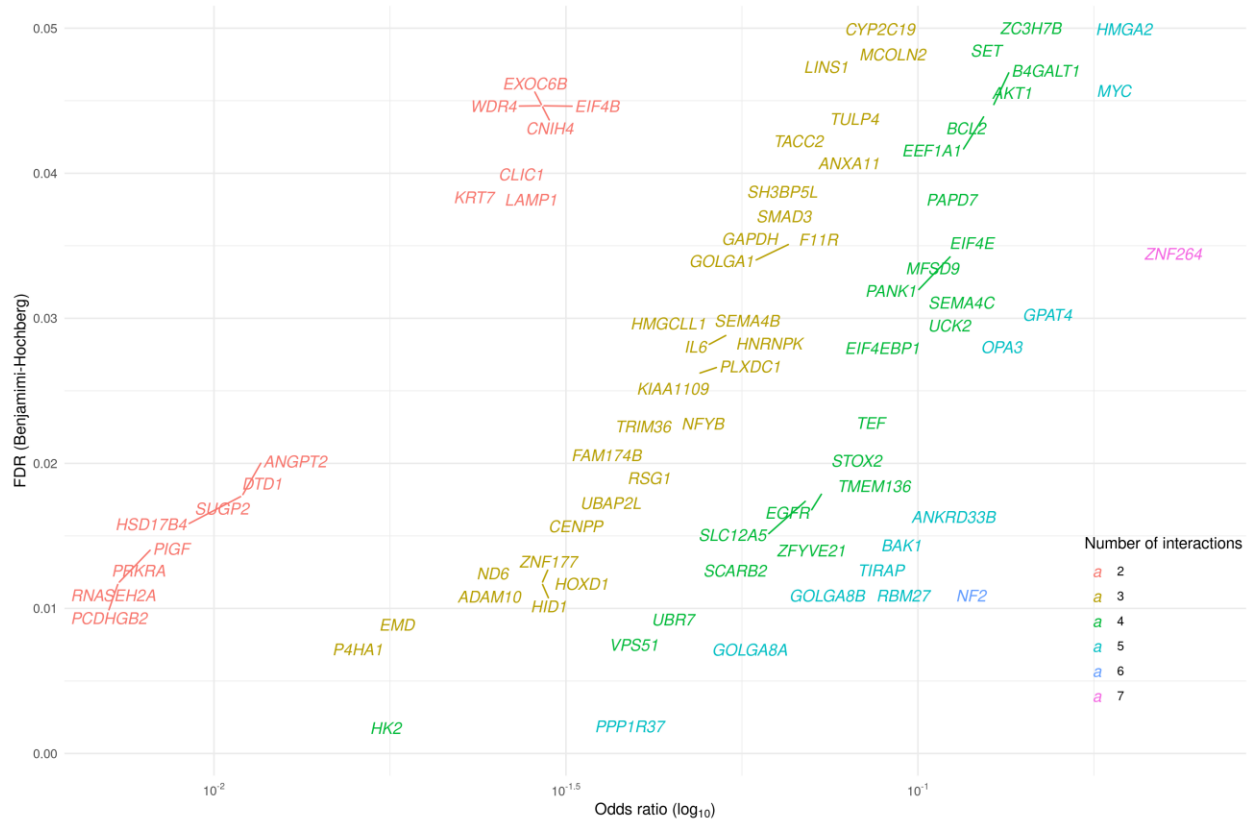

35

36 *Figure S5: Predicted gene targets based on miRTarBase involving genes that were matched by*  
 37 *at least 2 from the 19 most differentially expressed miRNAs.*

38

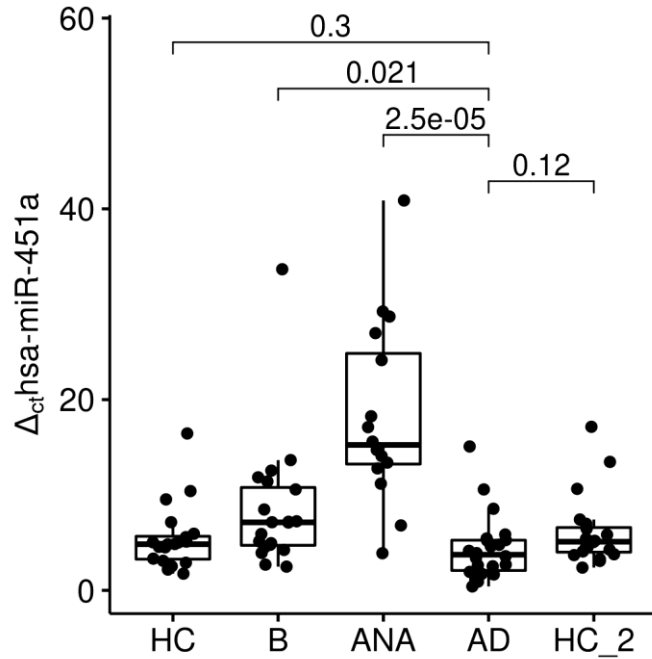

39

40 *Figure S6: Comparison of hsa-mir-451a serum levels in patients undergoing anaphylaxis (ANA, n*  
 41 *= 16), their corresponding baseline (B, n = 16) and moderate-to-severe atopic dermatitis*  
 42 *patients (AD, n = 22) without previous history of anaphylaxis as well as two control groups (HC,*  
 43 *n = 20 and HC\_2, n = 20). Two-tailed Student's T test.*

44



45 *Table S1: Demographic data of the studied individuals. FIA - food induced anaphylaxis, VIA -*  
 46 *venom induced anaphylaxis, ANA - anaphylaxis, HC - healthy control, NA - not available.*

| Sample ID | Age | Sex    | Elicitor | Group | Ethnicity   |
|-----------|-----|--------|----------|-------|-------------|
| RS01      | 21  | female | FIA      | ANA   | Caucasian   |
| RS02      | 26  | female | FIA      | ANA   | Caucasian   |
| RS08      | 32  | female | FIA      | ANA   | Caucasian   |
| RS09      | 24  | female | DIA      | ANA   | Caucasian   |
| RS10      | 37  | male   | NA       | ANA   | Middle East |
| RS12      | 35  | female | FIA      | ANA   | Caucasian   |
| RS16      | 29  | male   | FIA      | ANA   | Middle East |
| RS18      | 55  | female | VIA      | ANA   | Middle East |
| RS22      | 29  | female | NA       | ANA   | Caucasian   |
| RS23      | 75  | female | FIA      | ANA   | Caucasian   |
| RS24      | 39  | female | FIA      | ANA   | Caucasian   |
| RS25      | 58  | male   | FIA      | ANA   | Caucasian   |
| RS28      | 31  | female | FIA      | ANA   | Caucasian   |
| RS29      | 35  | male   | FIA      | ANA   | Caucasian   |
| RS30      | 69  | female | DIA      | ANA   | Caucasian   |

| Sample ID | Age | Sex    | Elicitor | Group | Ethnicity   |
|-----------|-----|--------|----------|-------|-------------|
| RS31      | 37  | male   | VIA      | ANA   | Caucasian   |
| RS32      | 57  | female | FIA      | ANA   | Caucasian   |
| RS33      | 77  | male   | VIA      | ANA   | Caucasian   |
| RS34      | 49  | male   | VIA      | ANA   | Caucasian   |
| RS35      | 53  | female | VIA      | ANA   | Caucasian   |
| RS36      | 31  | female | VIA      | ANA   | Caucasian   |
| RS38      | 62  | male   | VIA      | ANA   | Caucasian   |
| RS42      | 25  | female | FIA      | ANA   | East Asian  |
| RS44      | 74  | female | VIA      | ANA   | Caucasian   |
| RS45      | 37  | male   | VIA      | ANA   | Caucasian   |
| RS46      | 67  | female | VIA      | ANA   | Caucasian   |
| RS47      | 58  | male   | VIA      | ANA   | Middle East |
| RS48      | 58  | male   | VIA      | ANA   | Caucasian   |
| RS49      | 50  | female | VIA      | ANA   | Caucasian   |
| RS51      | 28  | male   | FIA      | ANA   | Caucasian   |
| RS52      | 53  | female | VIA      | ANA   | Caucasian   |
| RS53      | 74  | male   | VIA      | ANA   | Caucasian   |

| Sample ID | Age | Sex    | Elicitor | Group | Ethnicity   |
|-----------|-----|--------|----------|-------|-------------|
| RS54      | 63  | female | VIA      | ANA   | Caucasian   |
| RS55      | 55  | male   | VIA      | ANA   | Caucasian   |
| RS56      | 76  | male   | VIA      | ANA   | Caucasian   |
| RS57      | 62  | female | VIA      | ANA   | Caucasian   |
| RS58      | 81  | female | VIA      | ANA   | Caucasian   |
| RS59      | 52  | female | VIA      | ANA   | Middle East |
| RS62      | 54  | female | VIA      | ANA   | Caucasian   |
| RS63      | 44  | male   | FIA      | ANA   | Caucasian   |
| RS64      | 64  | female | FIA      | ANA   | Caucasian   |
| RS65      | 61  | male   | FIA      | ANA   | East Asian  |
| RS67      | 41  | female | DIA      | ANA   | Caucasian   |
| RS68      | 71  | female | FIA      | ANA   | Caucasian   |
| RS69      | 24  | female | FIA      | ANA   | Caucasian   |
| RS70      | 36  | male   | FIA      | ANA   | Caucasian   |
| RS71      | 23  | male   | NA       | ANA   | Caucasian   |
| KT01      | 51  | female | NA       | HC    | Caucasian   |
| KT02      | 29  | male   | NA       | HC    | Caucasian   |

| Sample ID | Age | Sex    | Elicitor | Group | Ethnicity |
|-----------|-----|--------|----------|-------|-----------|
| KT03      | 18  | female | NA       | HC    | Caucasian |
| KT04      | 58  | female | NA       | HC    | Caucasian |
| KT05      | 35  | female | NA       | HC    | Caucasian |
| KT07      | 40  | female | NA       | HC    | Caucasian |
| KT08      | 58  | male   | NA       | HC    | Caucasian |
| KT09      | 73  | male   | NA       | HC    | Caucasian |
| KT10      | 78  | male   | NA       | HC    | Caucasian |
| KT14      | 54  | male   | NA       | HC    | Caucasian |
| KT15      | NA  | male   | NA       | HC    | Caucasian |
| KT19      | 77  | female | NA       | HC    | Caucasian |
| KT20      | 77  | male   | NA       | HC    | Caucasian |
| KT21      | 68  | female | NA       | HC    | Caucasian |
| K8        | 31  | male   | NA       | HC    | Caucasian |
| K9        | 31  | female | NA       | HC    | Caucasian |
| K18       | 41  | male   | NA       | HC    | Caucasian |
| K19       | 38  | female | NA       | HC    | Caucasian |
| K21       | 23  | female | NA       | HC    | Caucasian |

| Sample ID | Age | Sex    | Elicitor | Group | Ethnicity |
|-----------|-----|--------|----------|-------|-----------|
| K24       | 26  | female | NA       | HC    | Caucasian |
| KT22      | 60  | female | NA       | HC    | Caucasian |
| K27       | 31  | male   | NA       | HC    | Caucasian |
| K26       | 35  | male   | NA       | HC    | Caucasian |
| K25       | 32  | male   | NA       | HC    | Caucasian |

47

48
